# Supplementary material for: Assessing the predictive validity of exam scores for competency: A cross-sectional study of nursing and midwifery admissions in Ghana
Source: Research Square preprint supplement (doi:10.21203/rs.3.rs-7575678/v1), 2025-10-23
Supplement: Supplementary file 1 [file f479dc3e8e101abfa5834231.pdf]

# Assessment of Interviewees' Knowledge on Elective Subjects

This survey assesses the academic preparedness of nursing and midwifery admission applicants across three programmes (Registered General Nursing, Registered Midwifery, Registered Nurse Assistant Clinical). Interviewers will use the standardised 0-2 scoring system to assess subject mastery, critical thinking, and communication skills of applicants while applicants will submit their socio-demographic data. By participating in this survey, you agree to answer questions as an applicant OR about the applicants's elective subject knowledge, allow anonymous use of your responses for research, and voluntarily withdraw at any time without penalty. Your identity will remain confidential, and results will not affect your application. Please confirm your consent by clicking OK below.

☐ OK

## Status

- ☐ Applicant
- ☐ Interviewer

## Applicant Number

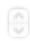

## Applicant's Demographics

### Gender

- ☐ Male
- ☐ Female

### Age

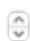

## Programme Studied in SHS

- ☐ General Arts
- ☐ Home Economics
- ☐ General Science

## Name of SHS

## School Category

- ☐ Public
- ☐ Private

School Grade

- ☐ Grade A
- ☐ Grade B
- ☐ Grade C

Location of SHS

Select the location of your SHS

- ☐ Urban
- ☐ Rural

Do you have relatives working in healthcare?

- ☐ Yes
- ☐ No

Did you write remedial

Indicate yes or no

- ☐ Yes
- ☐ No

Which year was your 1st WASSCE sitting

Enter year only (e.g. 2022)

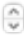

How many results did you submit during the application?

Select one that applies to you

- ☐ 1
- ☐ 2 or more

Programme applied for?

Select the one that applies to you

- ☐ Nurse Assistant Clinical
- ☐ Regitered General Nursing
- ☐ Registered Midwifery

What was your overall aggregate?

Enter only aggregate (e.g. 16)

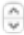

Interviewer's Assessment

## Applicant's Number

---

### Foundational knowledge

*Grasp of core principles, theories, and facts*

- ☐ Poor (unclear or irrelevant)
- ☐ Adequate (understandable but lacks polish)
- ☐ Exceptional (clear and structured)

### Subject-specific mastery

*Evaluate depth of knowledge in applicant's strongest SHS elective*

- ☐ Poor (unclear or irrelevant)
- ☐ Adequate (understandable but lacks polish)
- ☐ Exceptional (clear and structured)

### Real-world application

*Test ability to apply elective knowledge*

- ☐ Poor (unclear or irrelevant)
- ☐ Adequate (understandable but lacks polish)
- ☐ Exceptional (clear and structured)

### General aptitude

*Evaluate problem-solving skills, critical thinking, and adaptability*

- ☐ Poor (unclear or irrelevant)
- ☐ Adequate (understandable but lacks polish)
- ☐ Exceptional (clear and structured)

### Communication

*Evaluate clarity in conveying ideas*

- ☐ Poor (unclear or irrelevant)
- ☐ Adequate (understandable but lacks polish)
- ☐ Exceptional (clear and structured)
